# Supplementary material for: Predictors of Patients’ Loyalty Toward Doctors on Web-Based Health Communities: Cross-Sectional Study
Source: PubMed Central journal article supplement (PMC6751093; doi:10.2196/14484), 2019-09-03
Supplement: jmir_v21i9e14484_app1.pdf [file jmir_v21i9e14484_app1.pdf]

Table A. Measurement instrument

| Constructs            | Items                                                                                                                                           |
|-----------------------|-------------------------------------------------------------------------------------------------------------------------------------------------|
| Patients' loyalty     | I would revisit this doctor on online health community.                                                                                         |
|                       | I would recommend this doctor on online health community to my friends.                                                                         |
|                       | I would pay the services from this doctor on online health community.                                                                           |
| Emotional attachment  | I would like to be friends with the doctor on online health community.                                                                          |
|                       | I would like to interact with the doctor on online health community in the future.                                                              |
|                       | I am interested in learning more about the doctor on online health community.                                                                   |
| Functional dependence | To solve my health problems, the doctor on online health community provide resources.                                                           |
|                       | To solve my health problems or concerns, the doctor on online health community provide supports.                                                |
|                       | To solve my health problems or concerns, the doctor on online health community provide outputs                                                  |
| Emotional interaction | During my interaction with this doctor on online health community, the doctor shows their interest in my problems/concerns.                     |
|                       | During my interaction with this doctor in online health community, the doctors give me sufficient time to present and discuss my problems.      |
|                       | During my interaction with this doctor on online health community, the doctor demonstrate sufficient devotion to the management of my problems. |
| Perceived expertise   | The doctor on online health community is an expert.                                                                                             |
|                       | The doctor on online health community is experienced.                                                                                           |
|                       | The doctor on online health community is knowledgeable                                                                                          |
|                       | The doctor on online health community is qualified                                                                                              |
|                       | The doctor on online health community is skilled.                                                                                               |
| Social norm           | People who influence my behavior think that I should interact with the doctor on online health community.                                       |
|                       | People who are important to me think that I should interact with the doctors on online health community                                         |

|                    |                                                                                                                                                                                                                                                                                                                                                                                                          |
|--------------------|----------------------------------------------------------------------------------------------------------------------------------------------------------------------------------------------------------------------------------------------------------------------------------------------------------------------------------------------------------------------------------------------------------|
| Sociability        | <p data-bbox="491 192 1348 235">Online health community enable me to get a good impression of others</p> <p data-bbox="491 246 1348 324">Online health community enable me to develop good social relationships with other online health community users.</p> <p data-bbox="491 347 1348 436">Online health community enables me to form close friendships with other online health community users.</p> |
| Personalization    | <p data-bbox="491 448 1348 490">I “set up” the online health community to use it the way I want to.</p> <p data-bbox="491 504 1348 546">I have adapted online health community to meet my needs.</p> <p data-bbox="491 560 1348 638">I have chosen features offered by online health community to suit my style of use</p>                                                                               |
| Perceived security | <p data-bbox="491 660 1348 703">In general, I feel secure in using this online health community.</p> <p data-bbox="491 716 1348 795">The online health community I used have implement security measures to protect their users.</p> <p data-bbox="491 817 1348 896">I would feel totally safe providing information about myself through online health community.</p>                                   |

---
